# Supplementary material
Source: publisher site journal article supplement (https://www.dovepress.com/article/544632)
Supplement: Supplementary file 1 [file Supplement%20Material-20251015_1.docx]

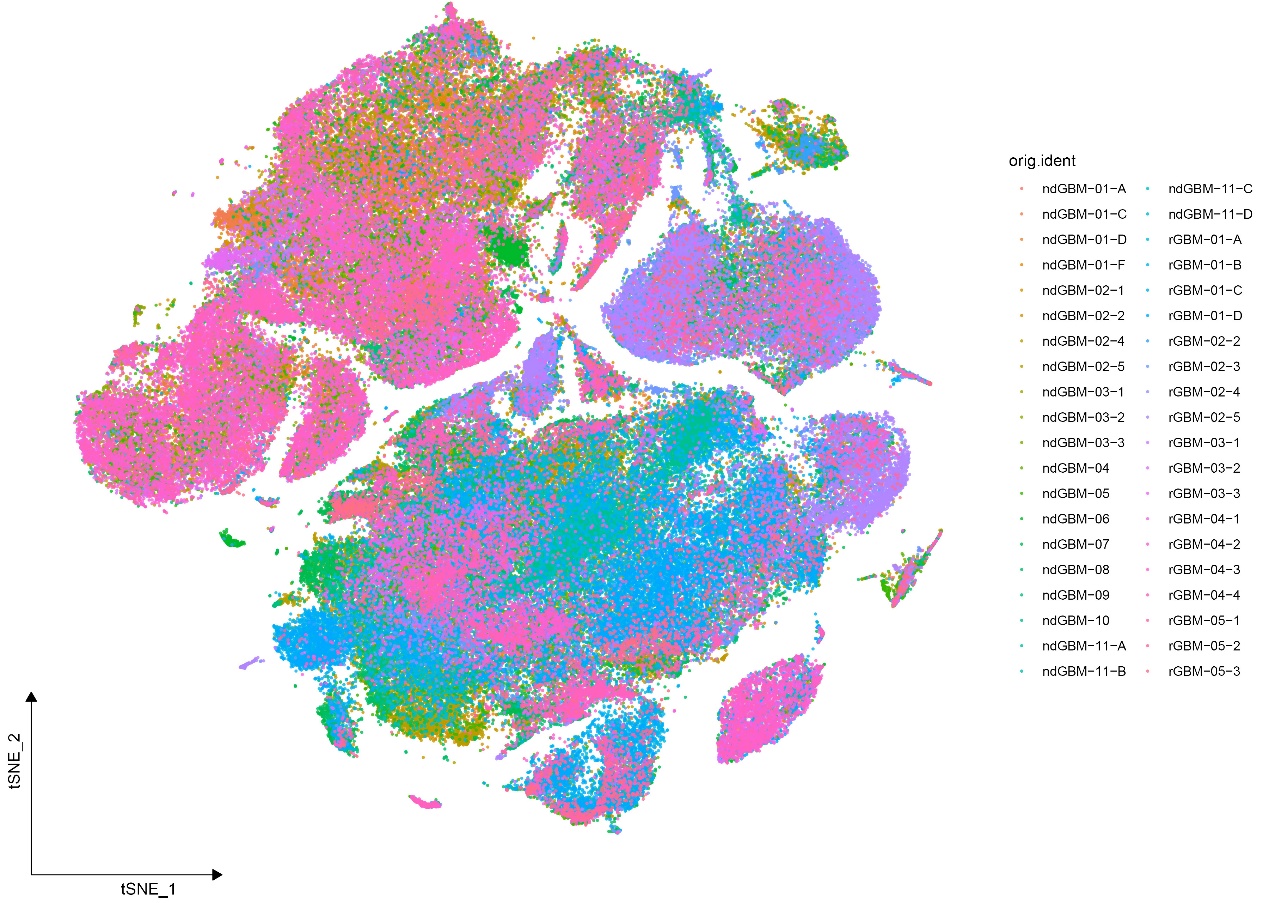


Supplementary Figure 1. t-SNE plot of scRNA-seq data (GSE182109) by sample


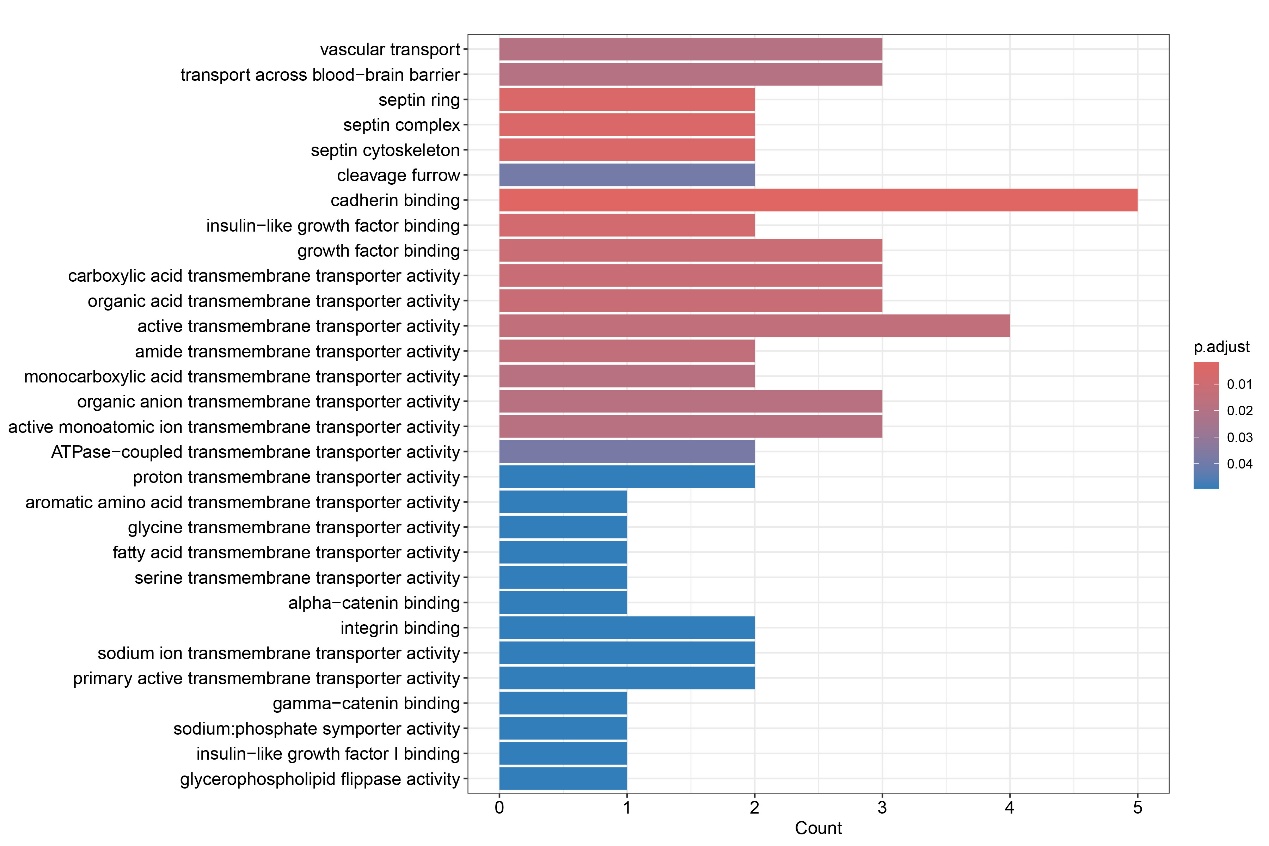


Supplementary Figure 2. GO enrichment analysis of characteristic genes in Endo0.


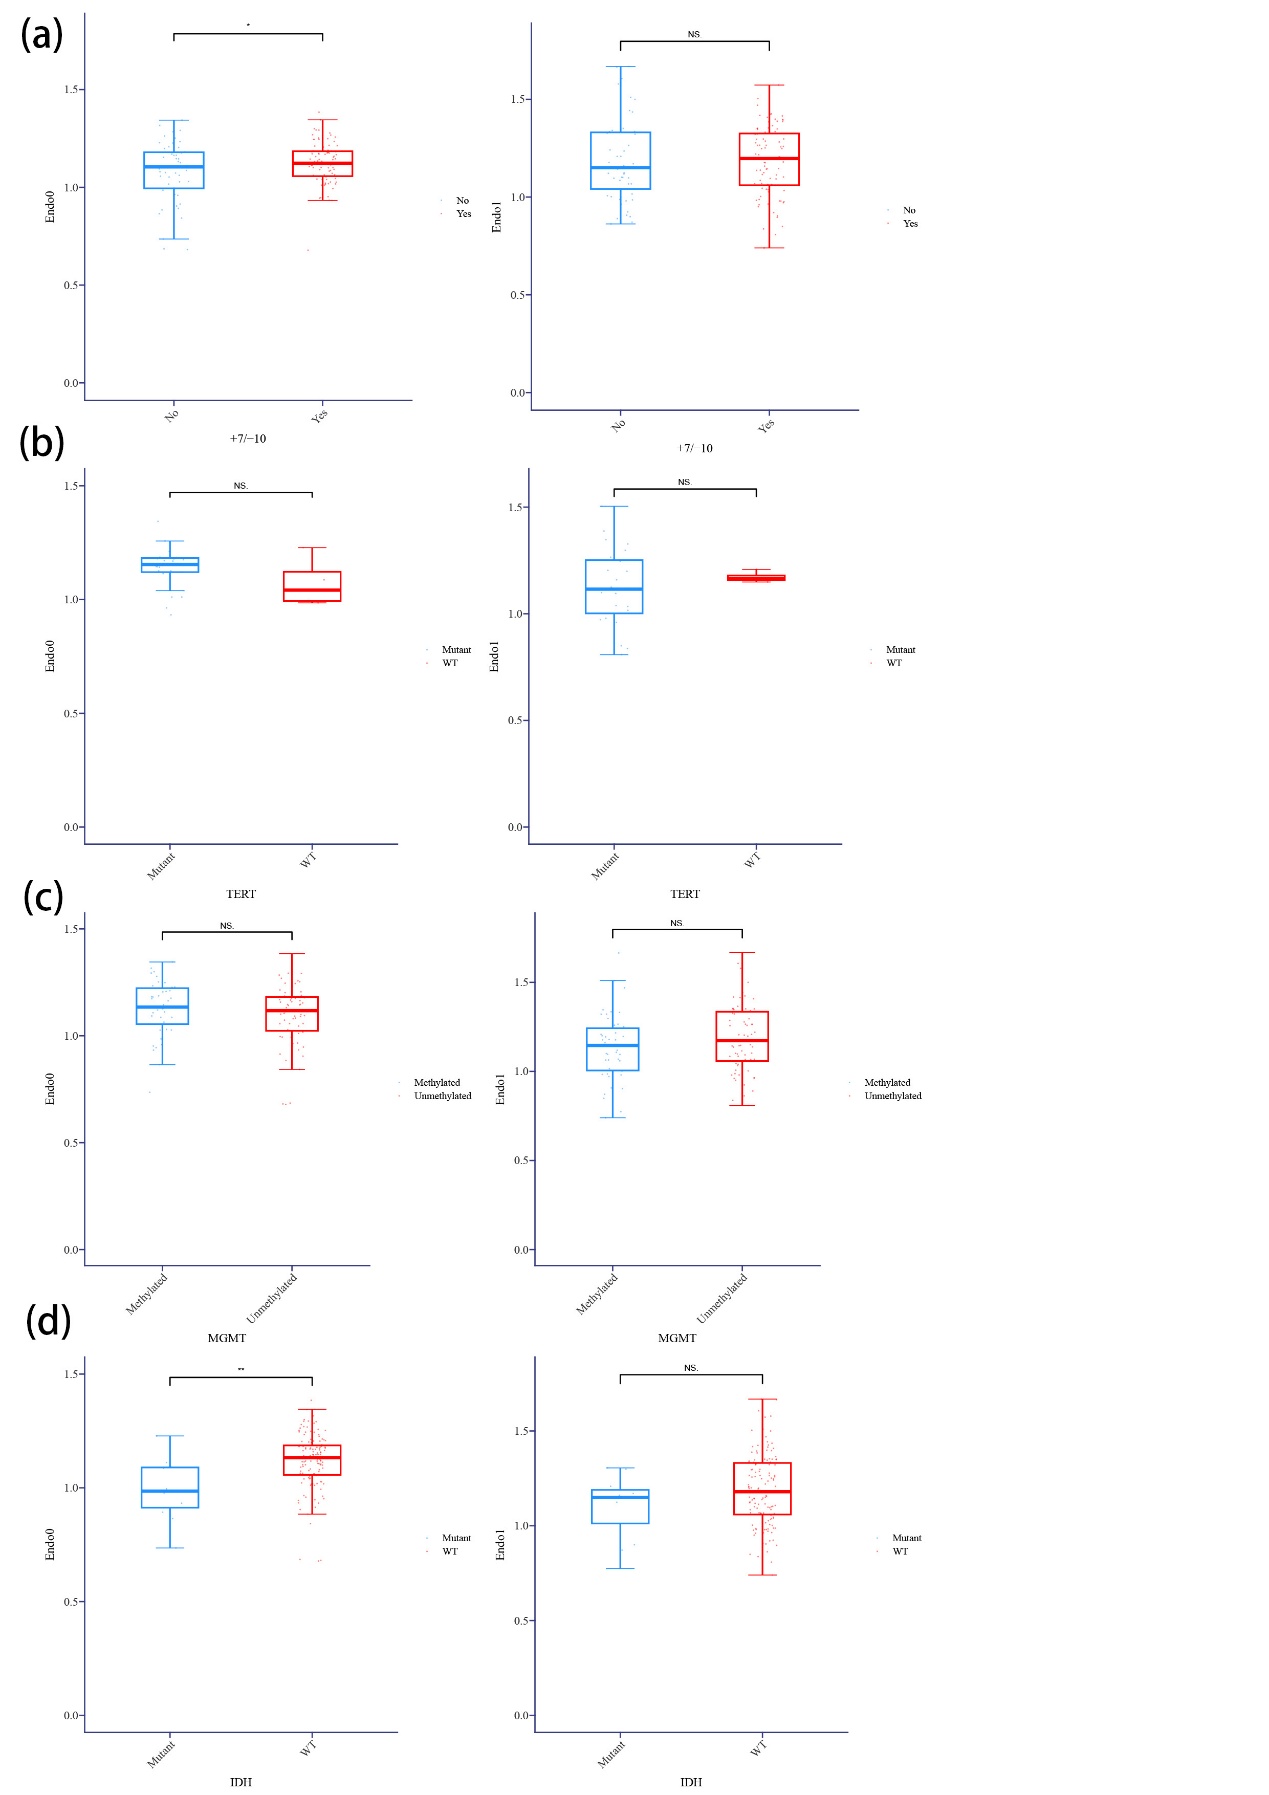


Supplementary Figure 3. Comparison of two endothelial scores across different statuses of (a) +7/10 chromosome copy-number alteration, (b) TERT promoter mutations, (c) MGMT methylation, and (d) IDH mutations in the GBM TCGA cohort. ns*P* > .05, **P* < .05 and ***P* < .01.


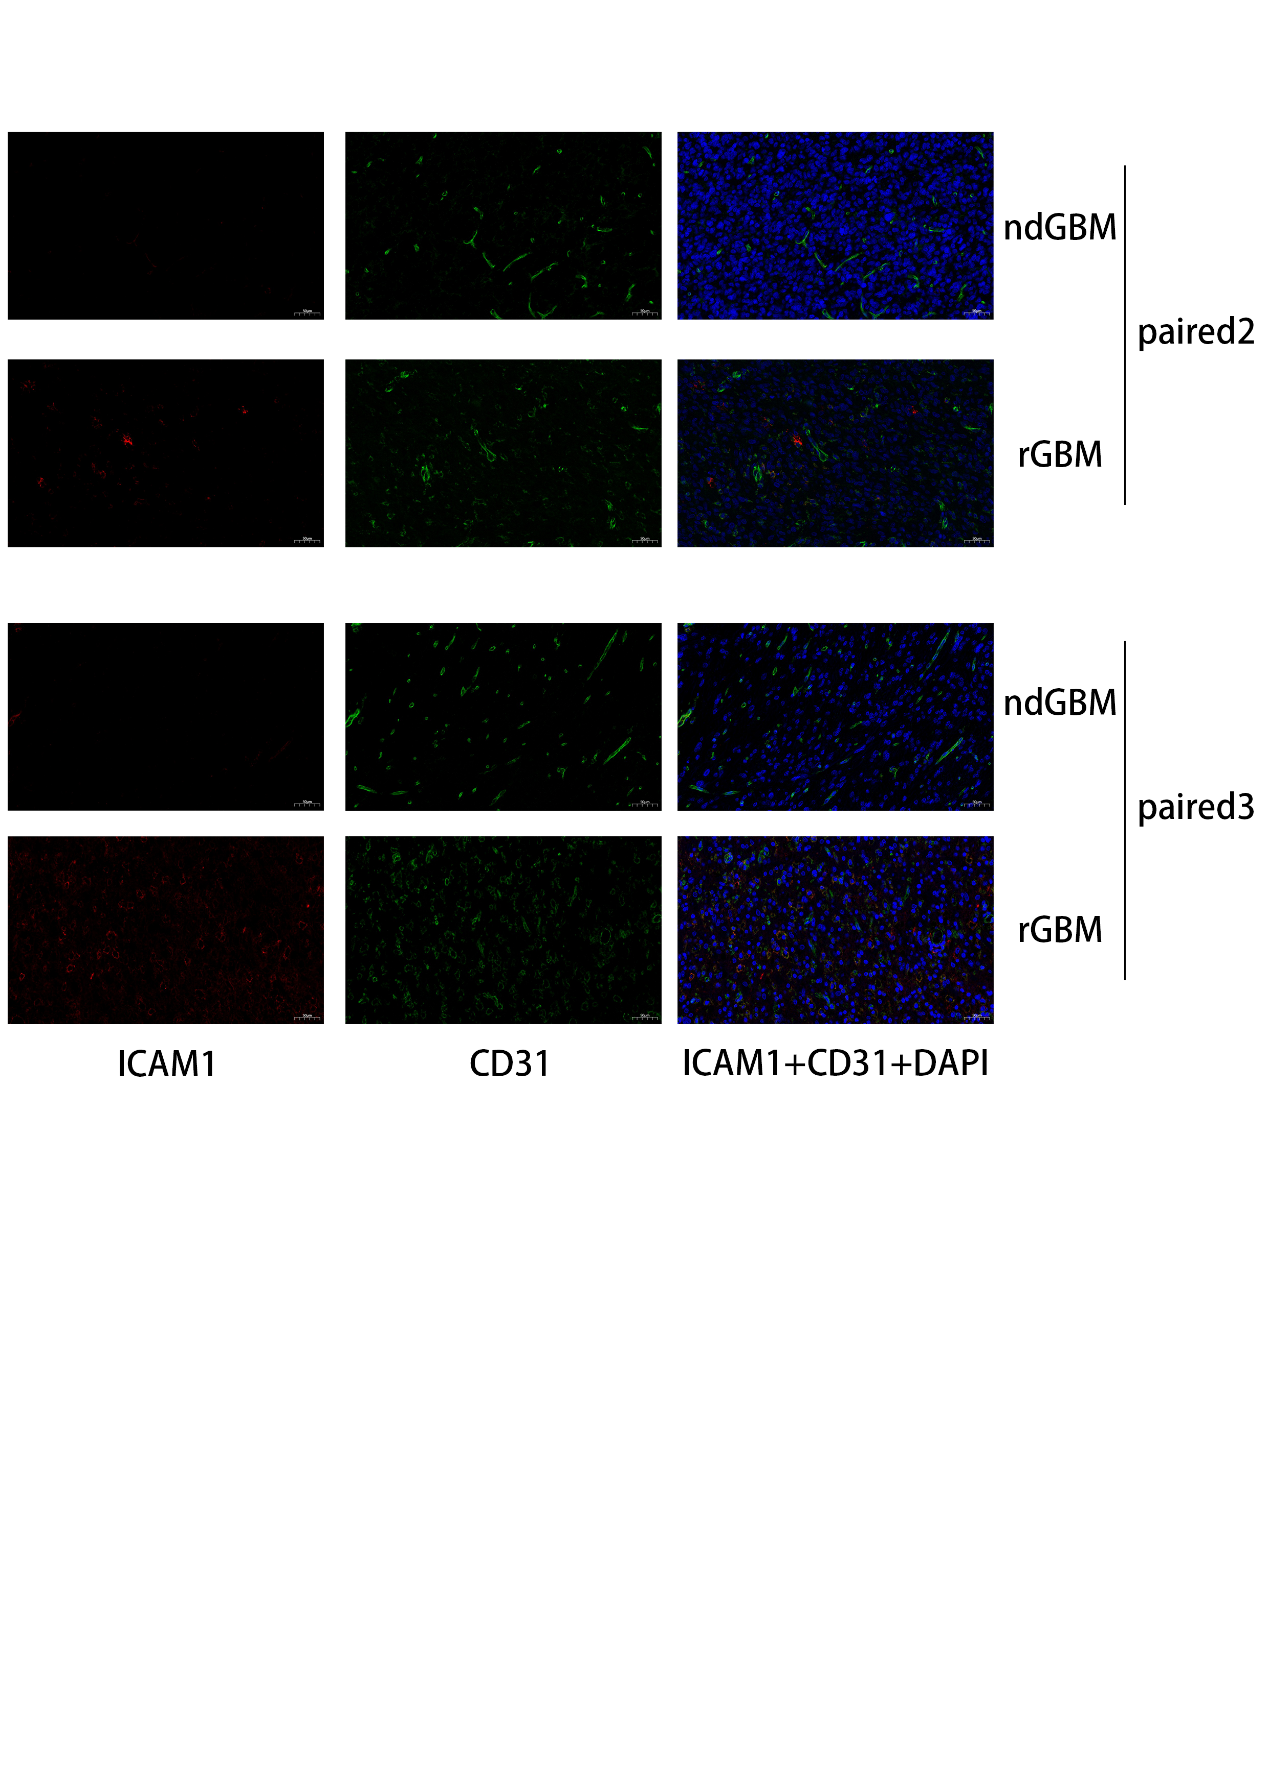
Supplementary Figure 4. The immunofluorescent staining of CD31 (green), ICAM1 (red) and DAPI (blue) in paired ndGBM and rGBM.


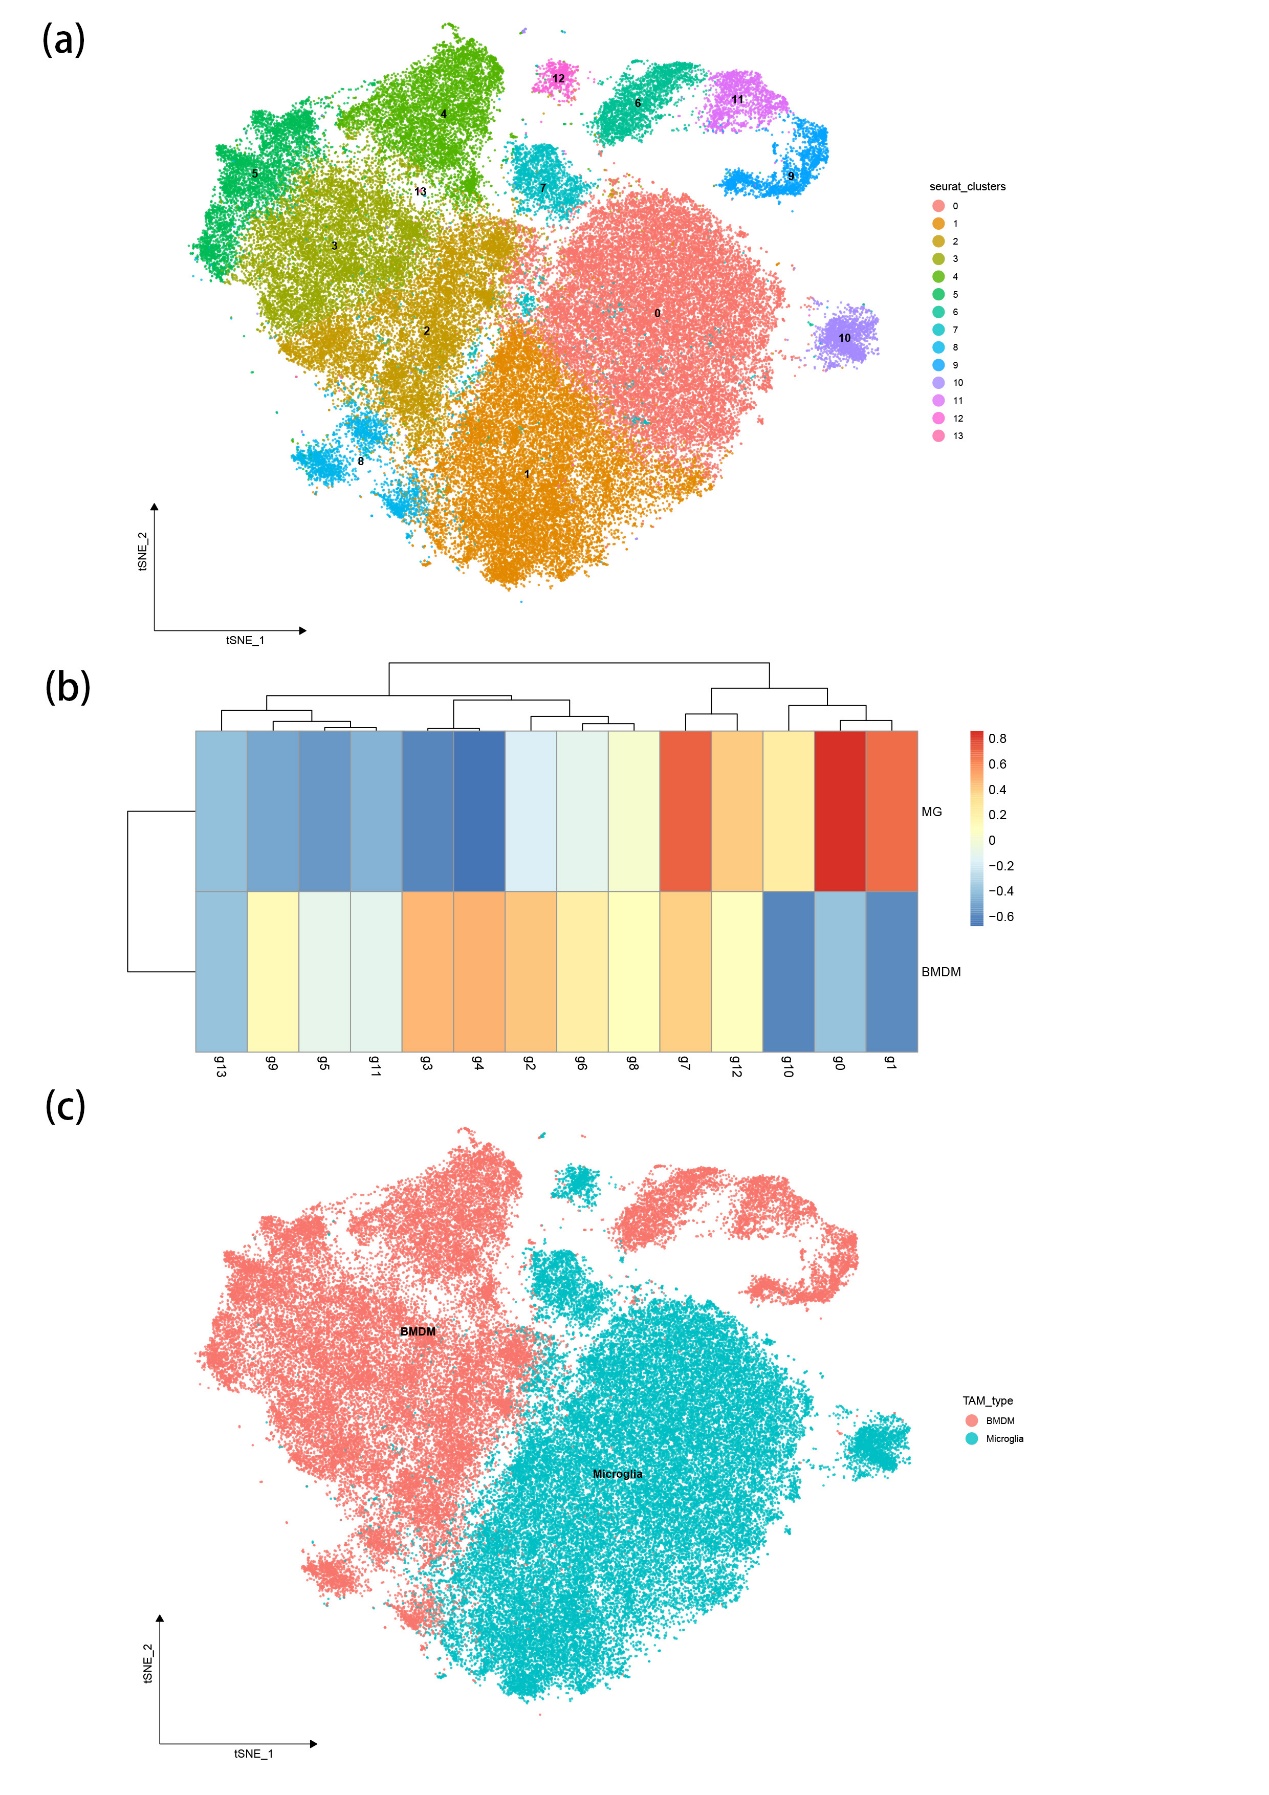


Supplementary Figure 5. Identification of BMDM and microglia. (a) t-SNE plot of TAM by sample. (b) GSVA analysis using myeloid cell to identify BMDM and microglia. (c) t-SNE plot of TAM by TAM types.


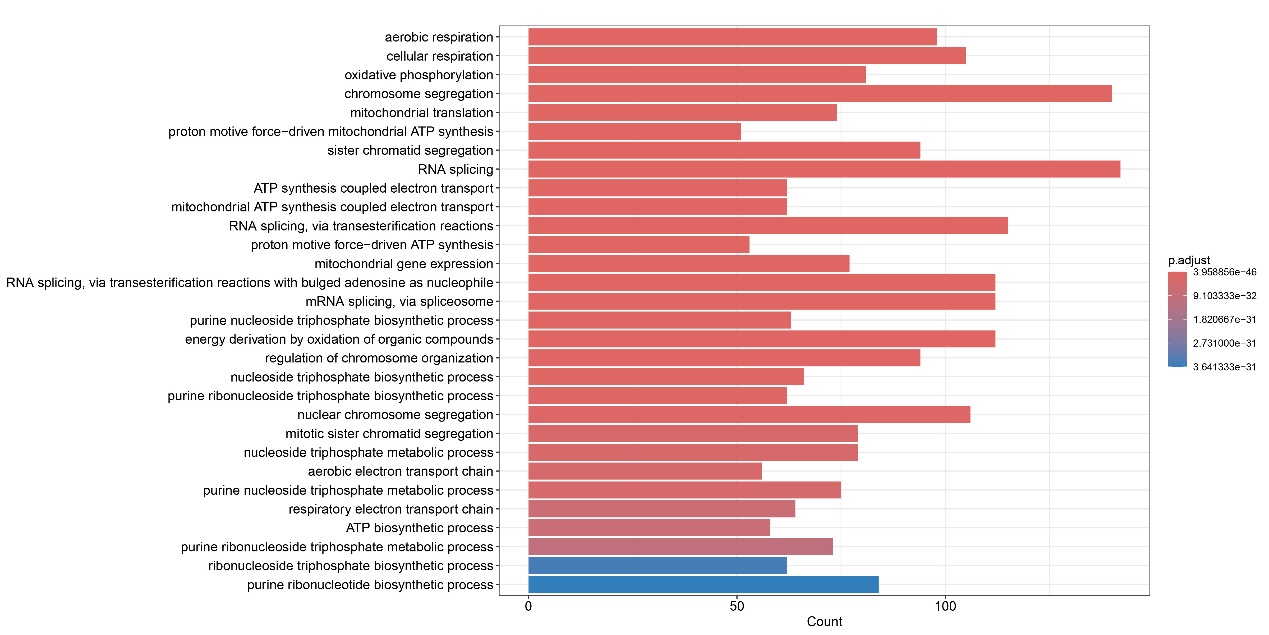


Supplementary Figure 6. GO enrichment analysis of characteristic genes in BMDM2.


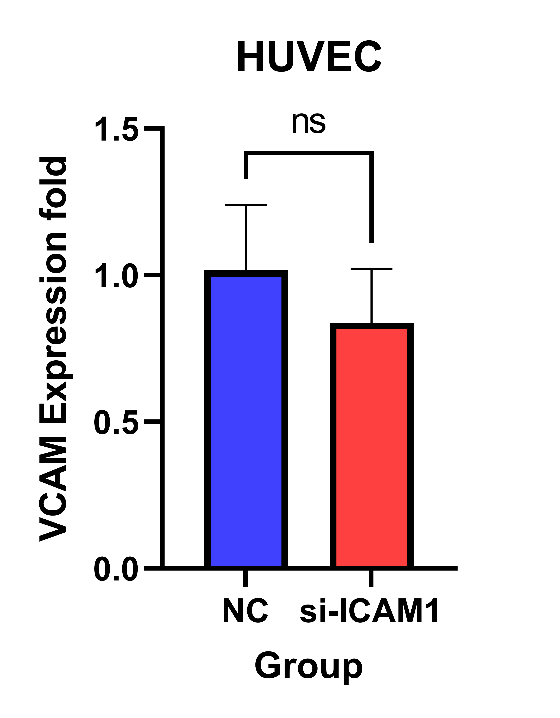

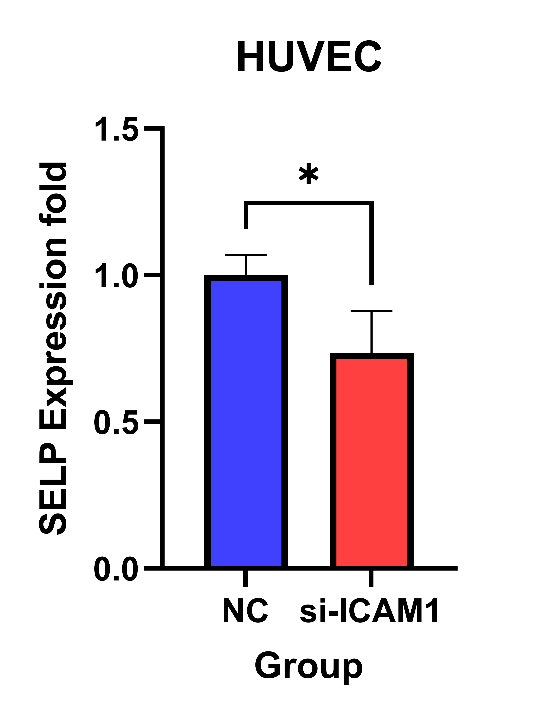

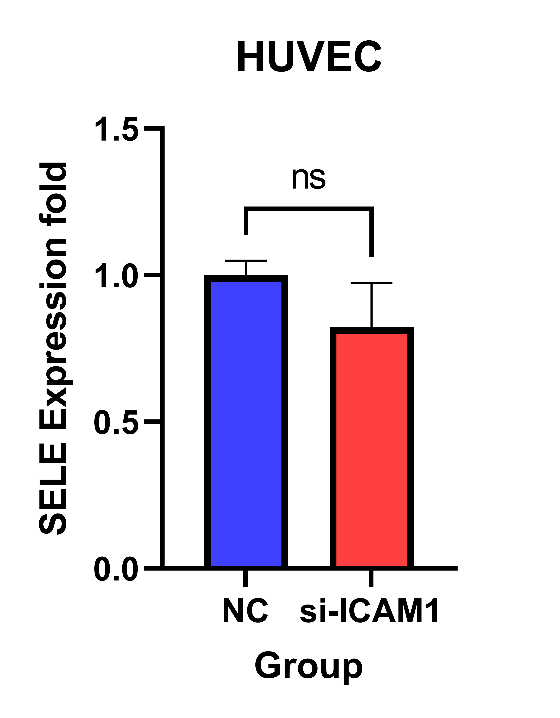
Supplementary Figure 7. mRNA expression levels of SELE, SELP, and VCAM1 measured by qPCR. ns*P* > .05 and **P* < .05.


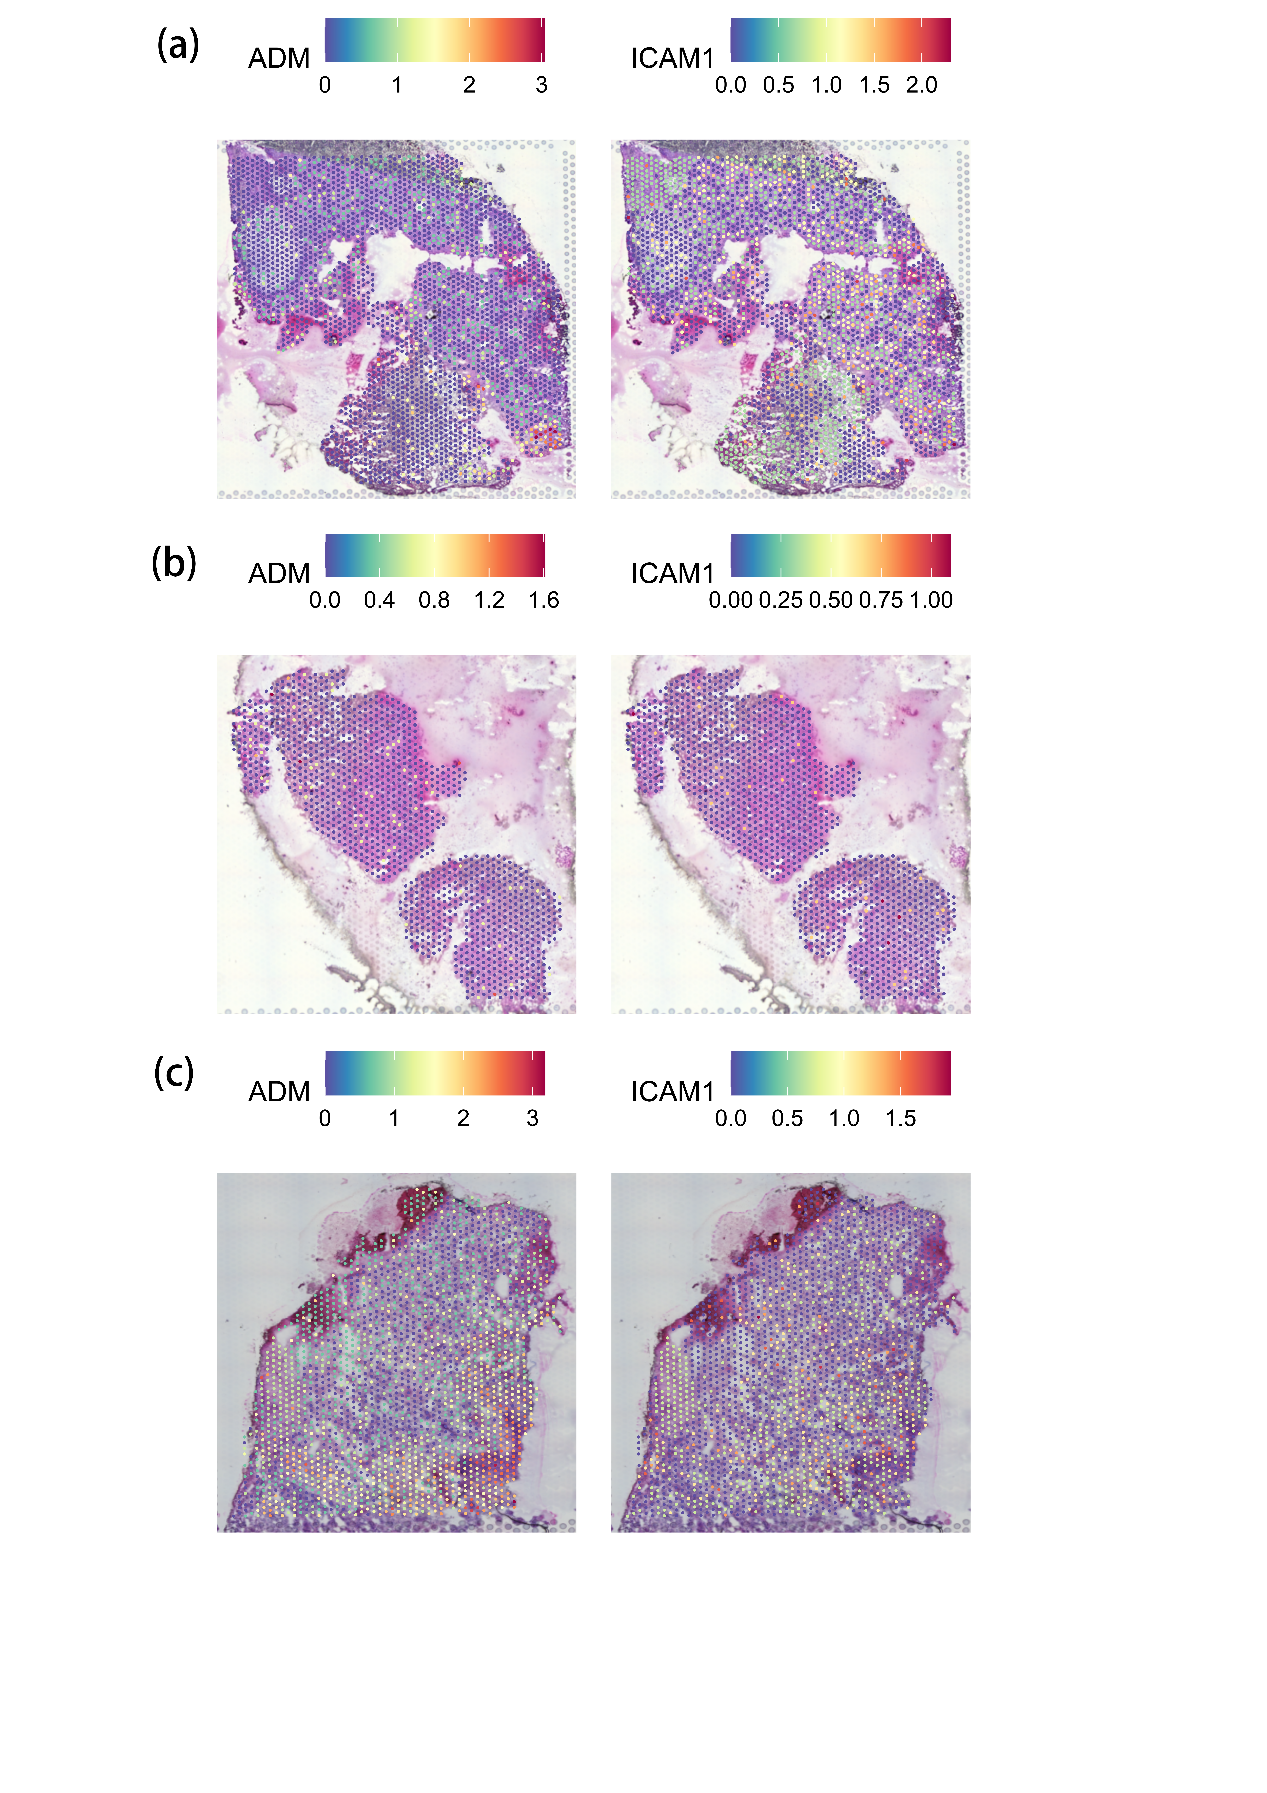


Supplementary Figure 8. Spatial transcriptomic analysis of ADM and ICAM1 expression levels in different tumor regions from the same patient in GSE237183: (a) T1-enhancing region, (b) infiltrative region, and (c) general tumor bulk region.


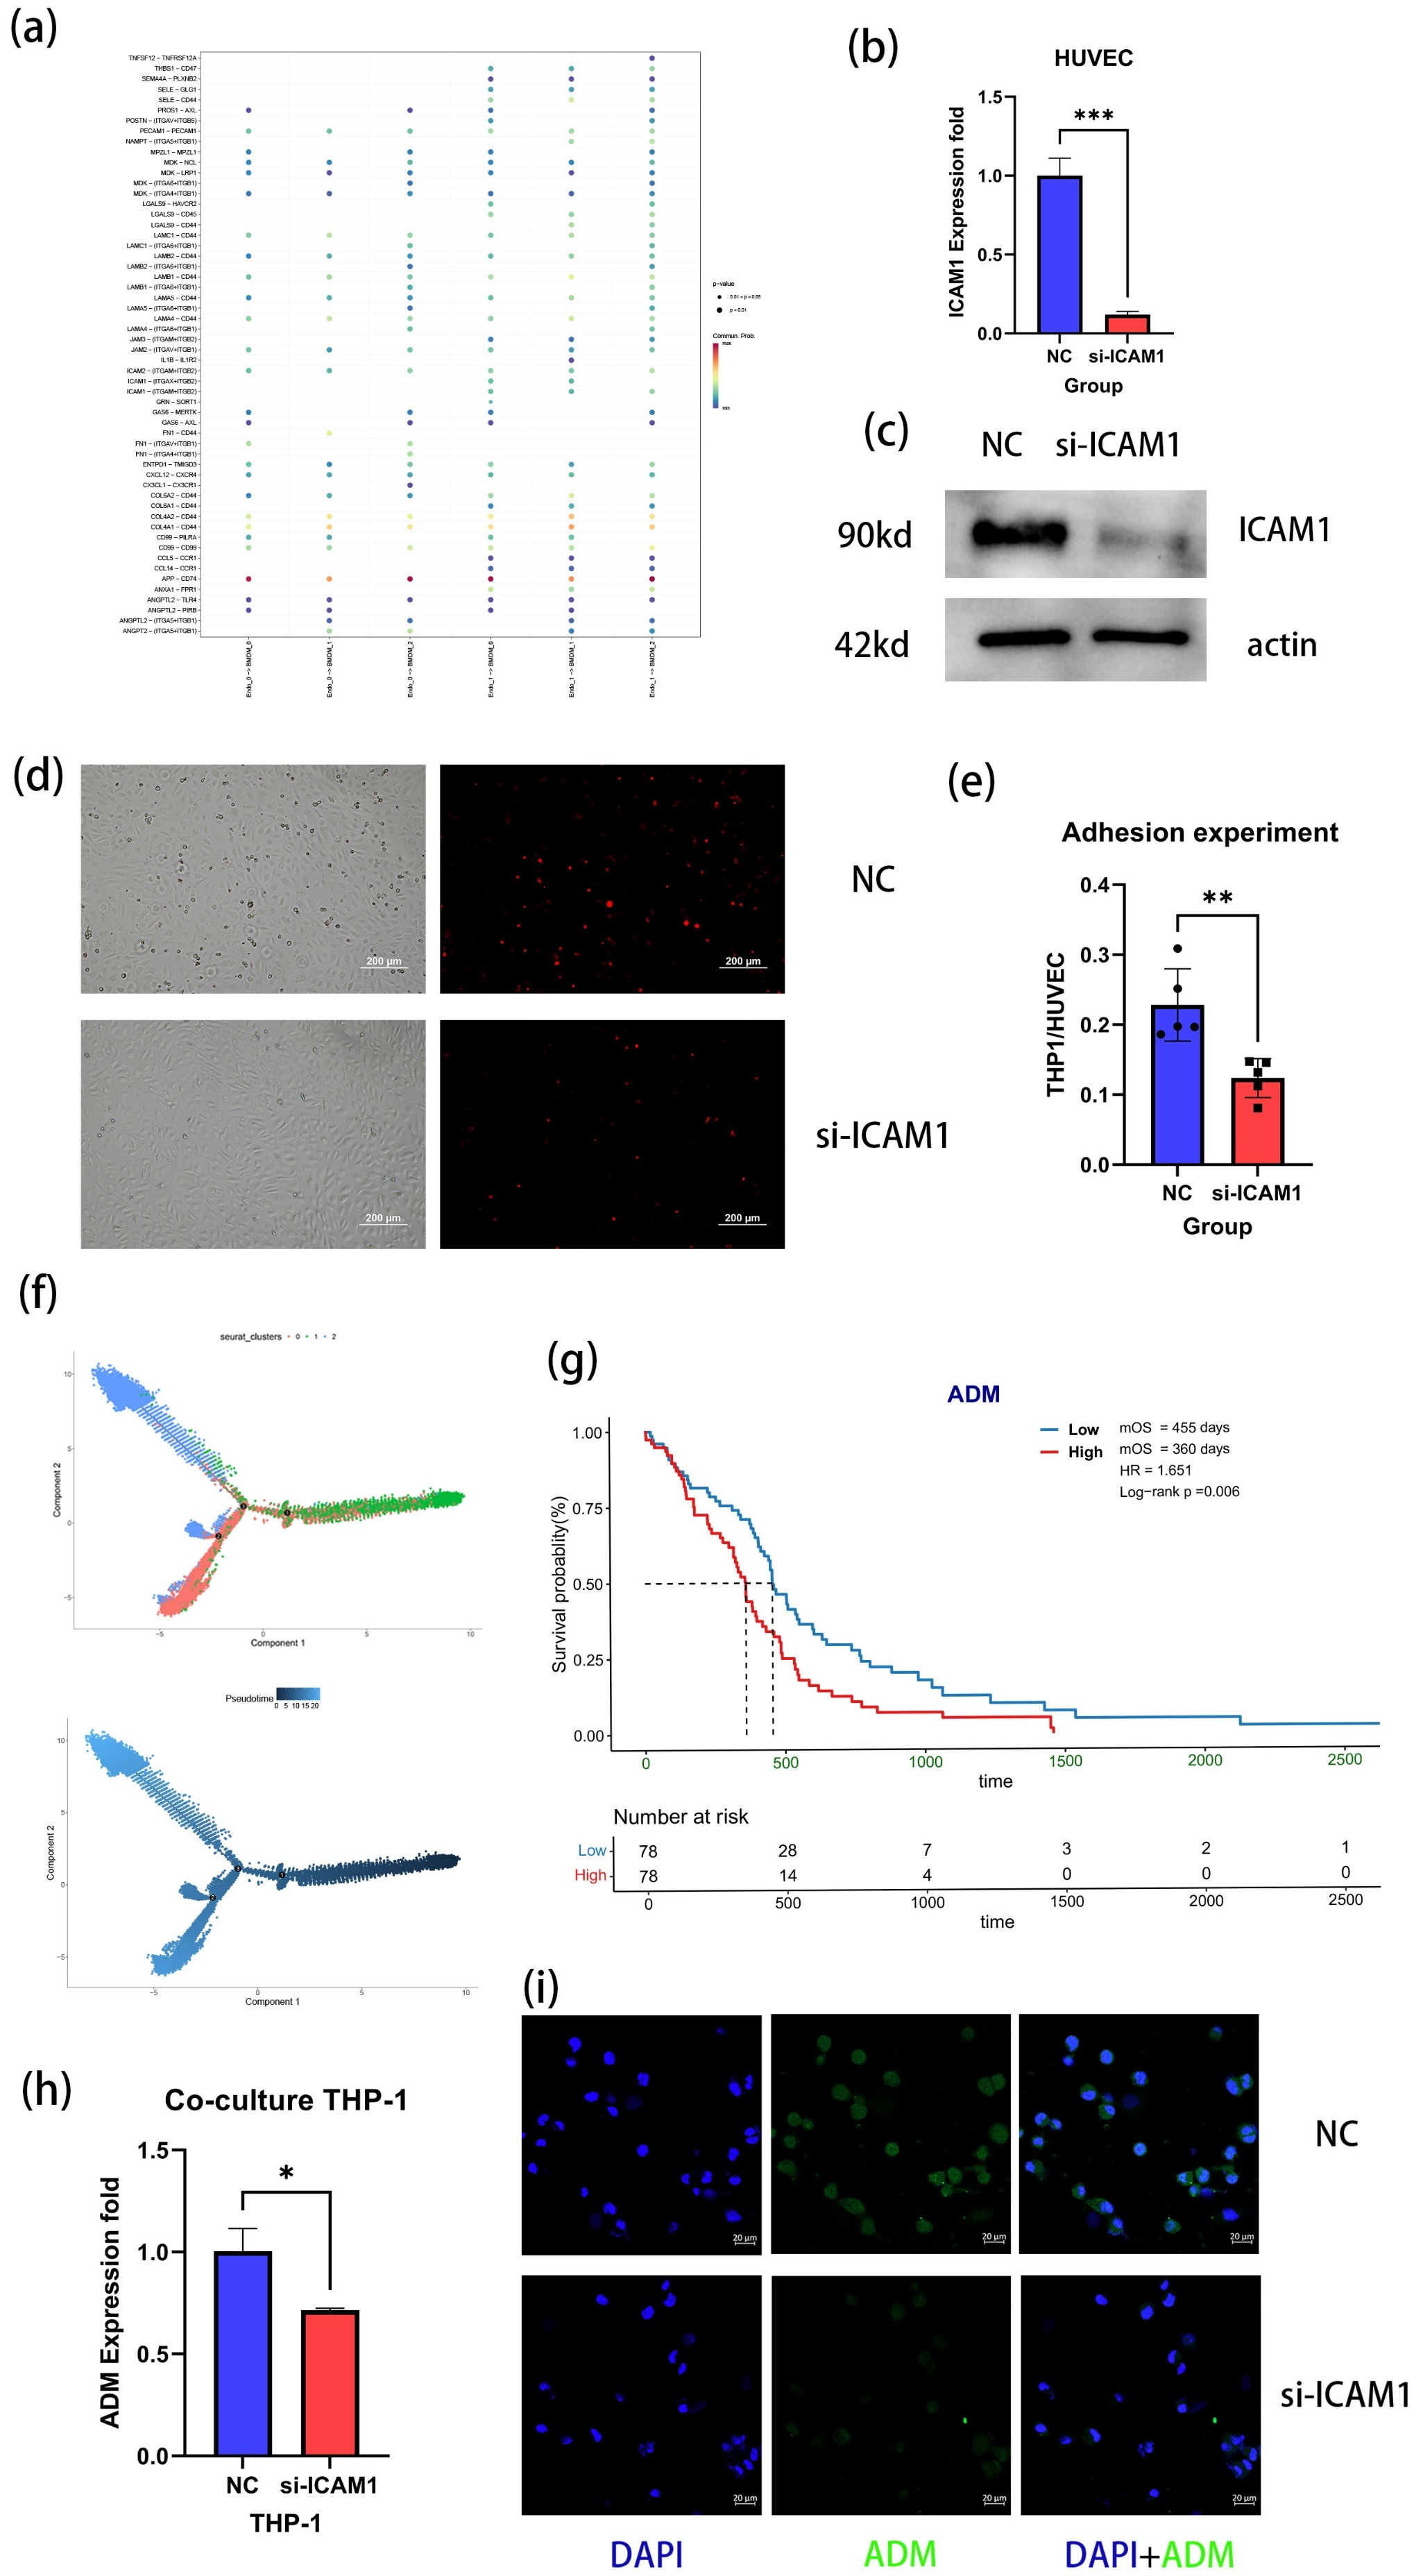


Supplementary Figure 9. Immunofluorescence staining of ADM (green) and nuclei (DAPI, blue) in co-cultured THP-1.

Supplementary Figure 10. mRNA expression levels of cytokines within Endo1 signature genes measured by qPCR.
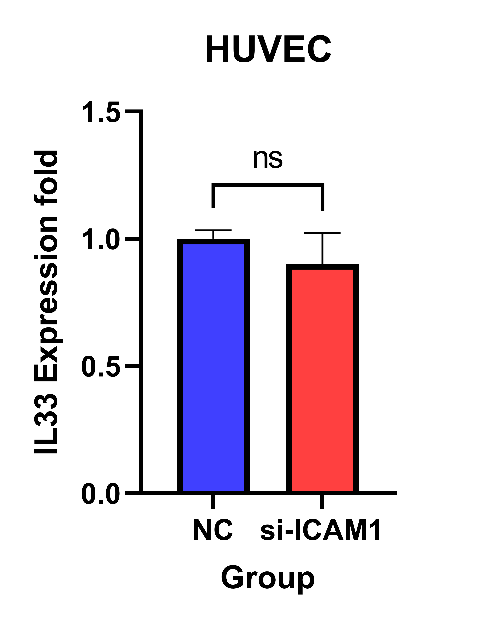

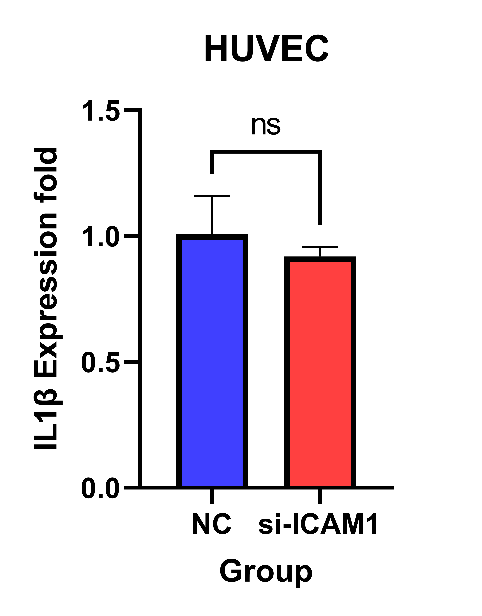

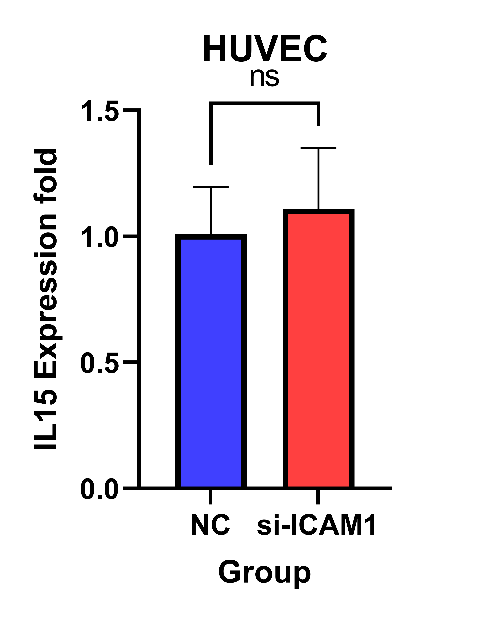

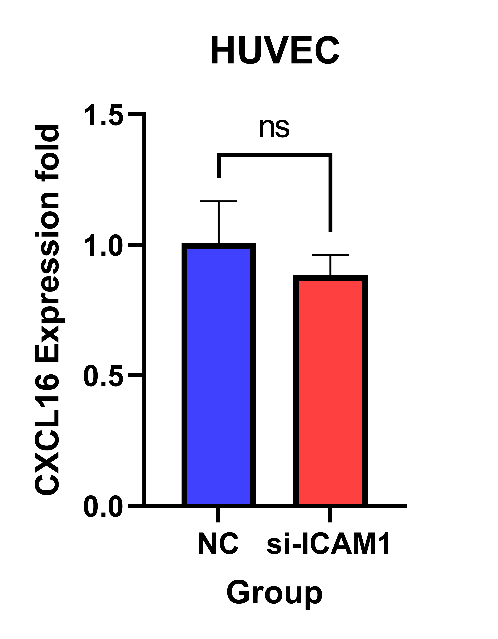

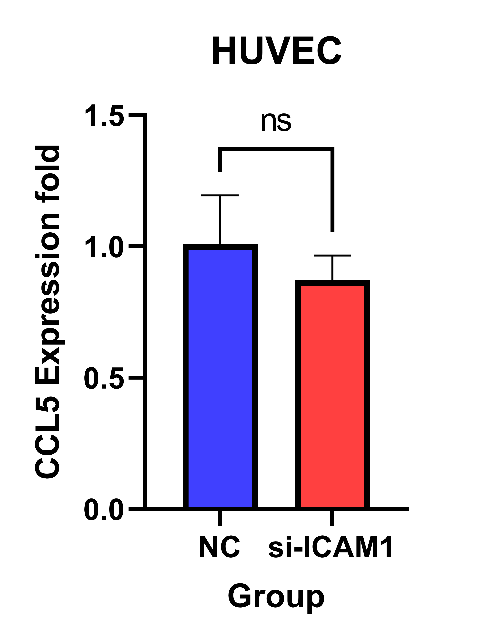
 ns*P* > .05.


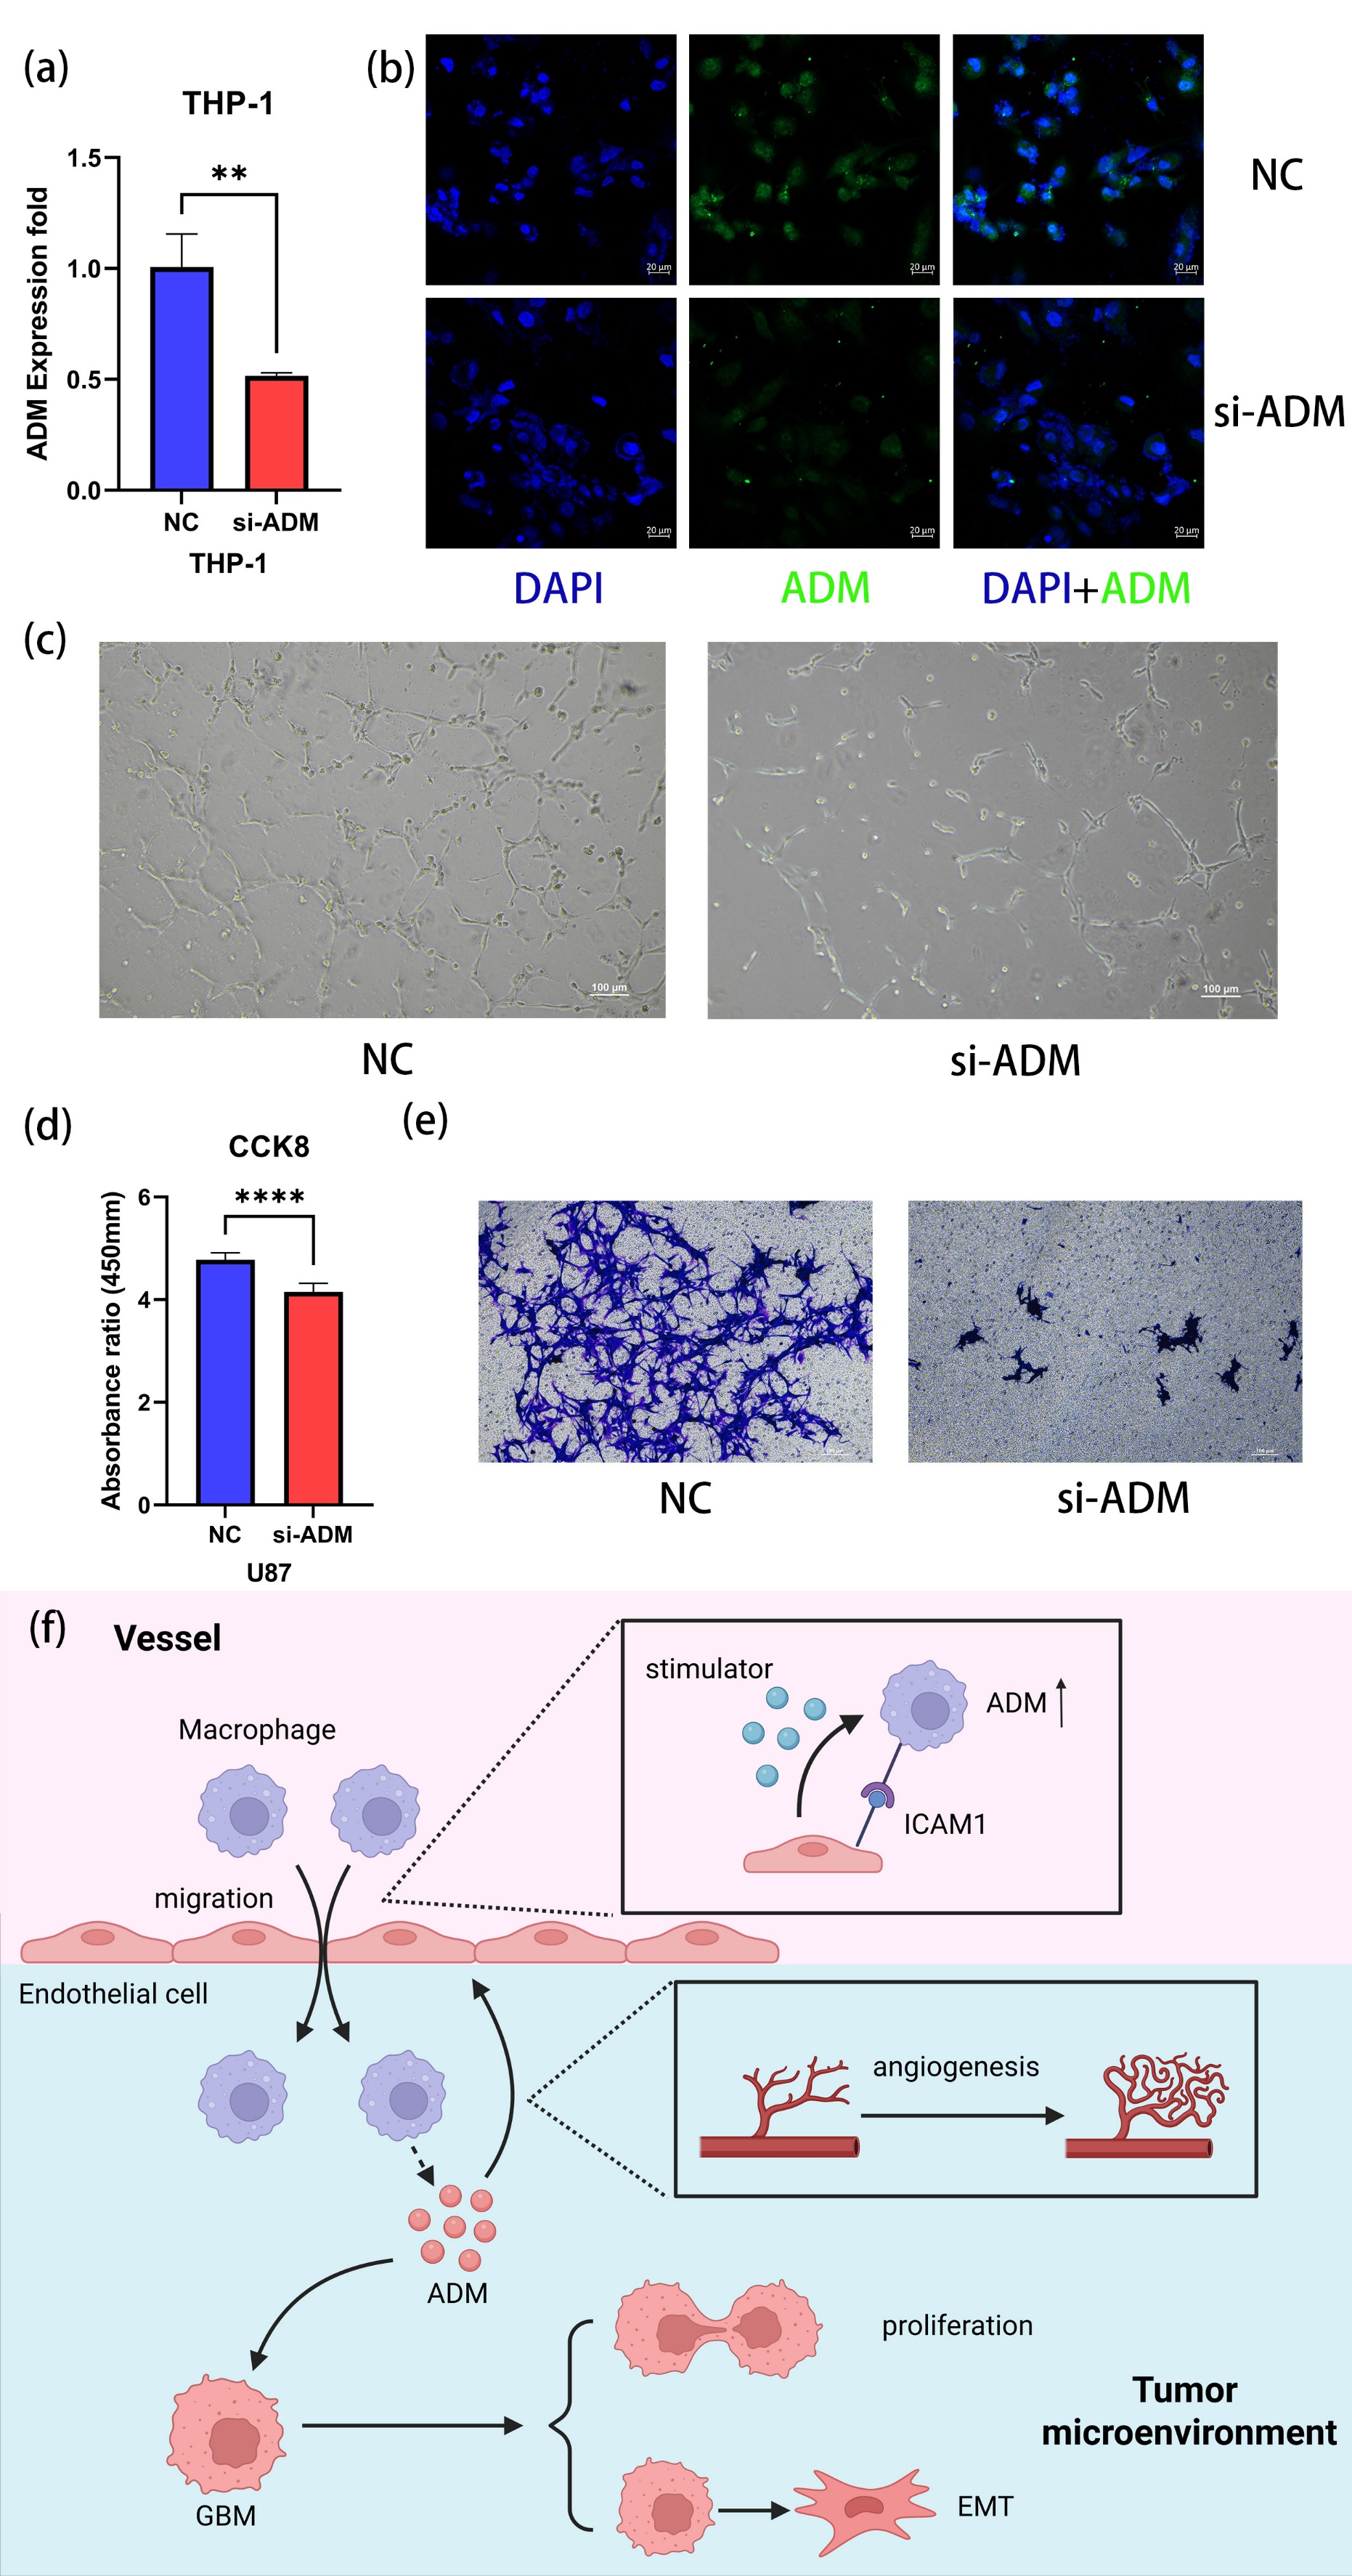


Supplementary Figure 11. Immunofluorescence staining of ADM (green) and nuclei (DAPI, blue) in ADM knockdown THP-1.

S
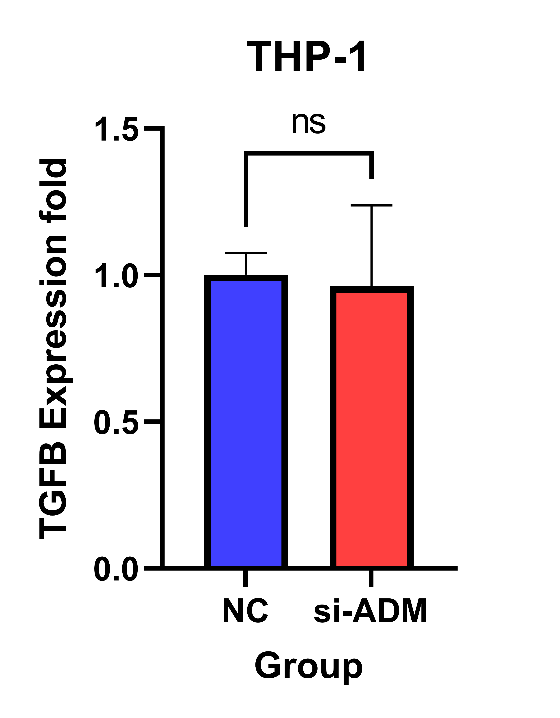

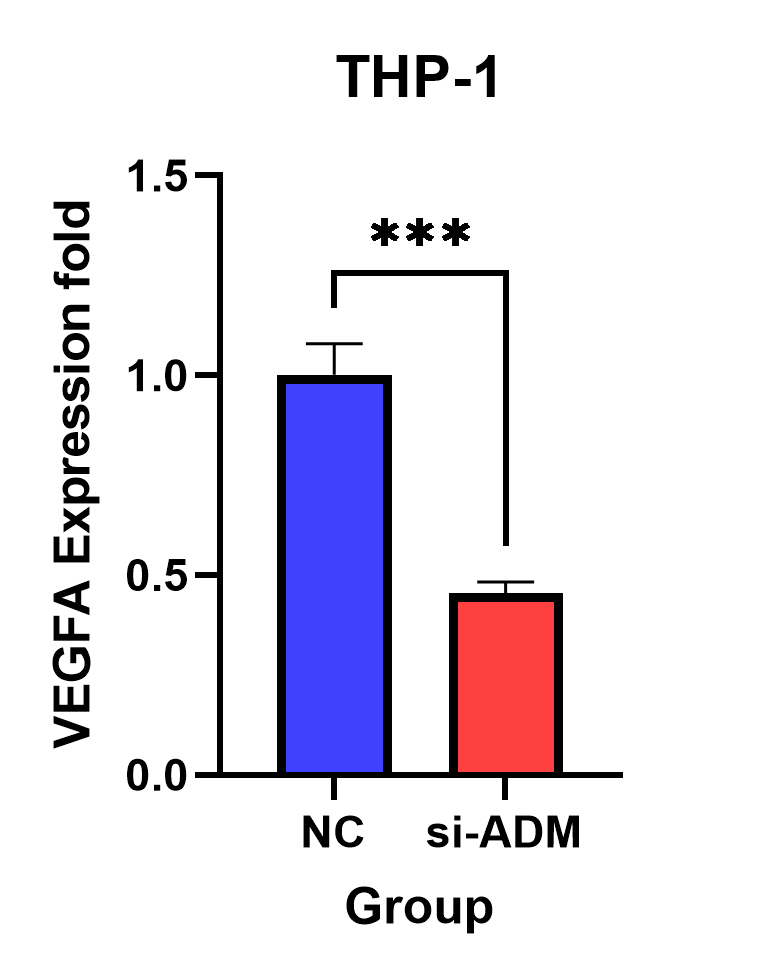
upplementary Figure 12. mRNA expression levels of VEGFA and TGFB measured by qPCR. ns*P* > .05 and ****P* < .001.


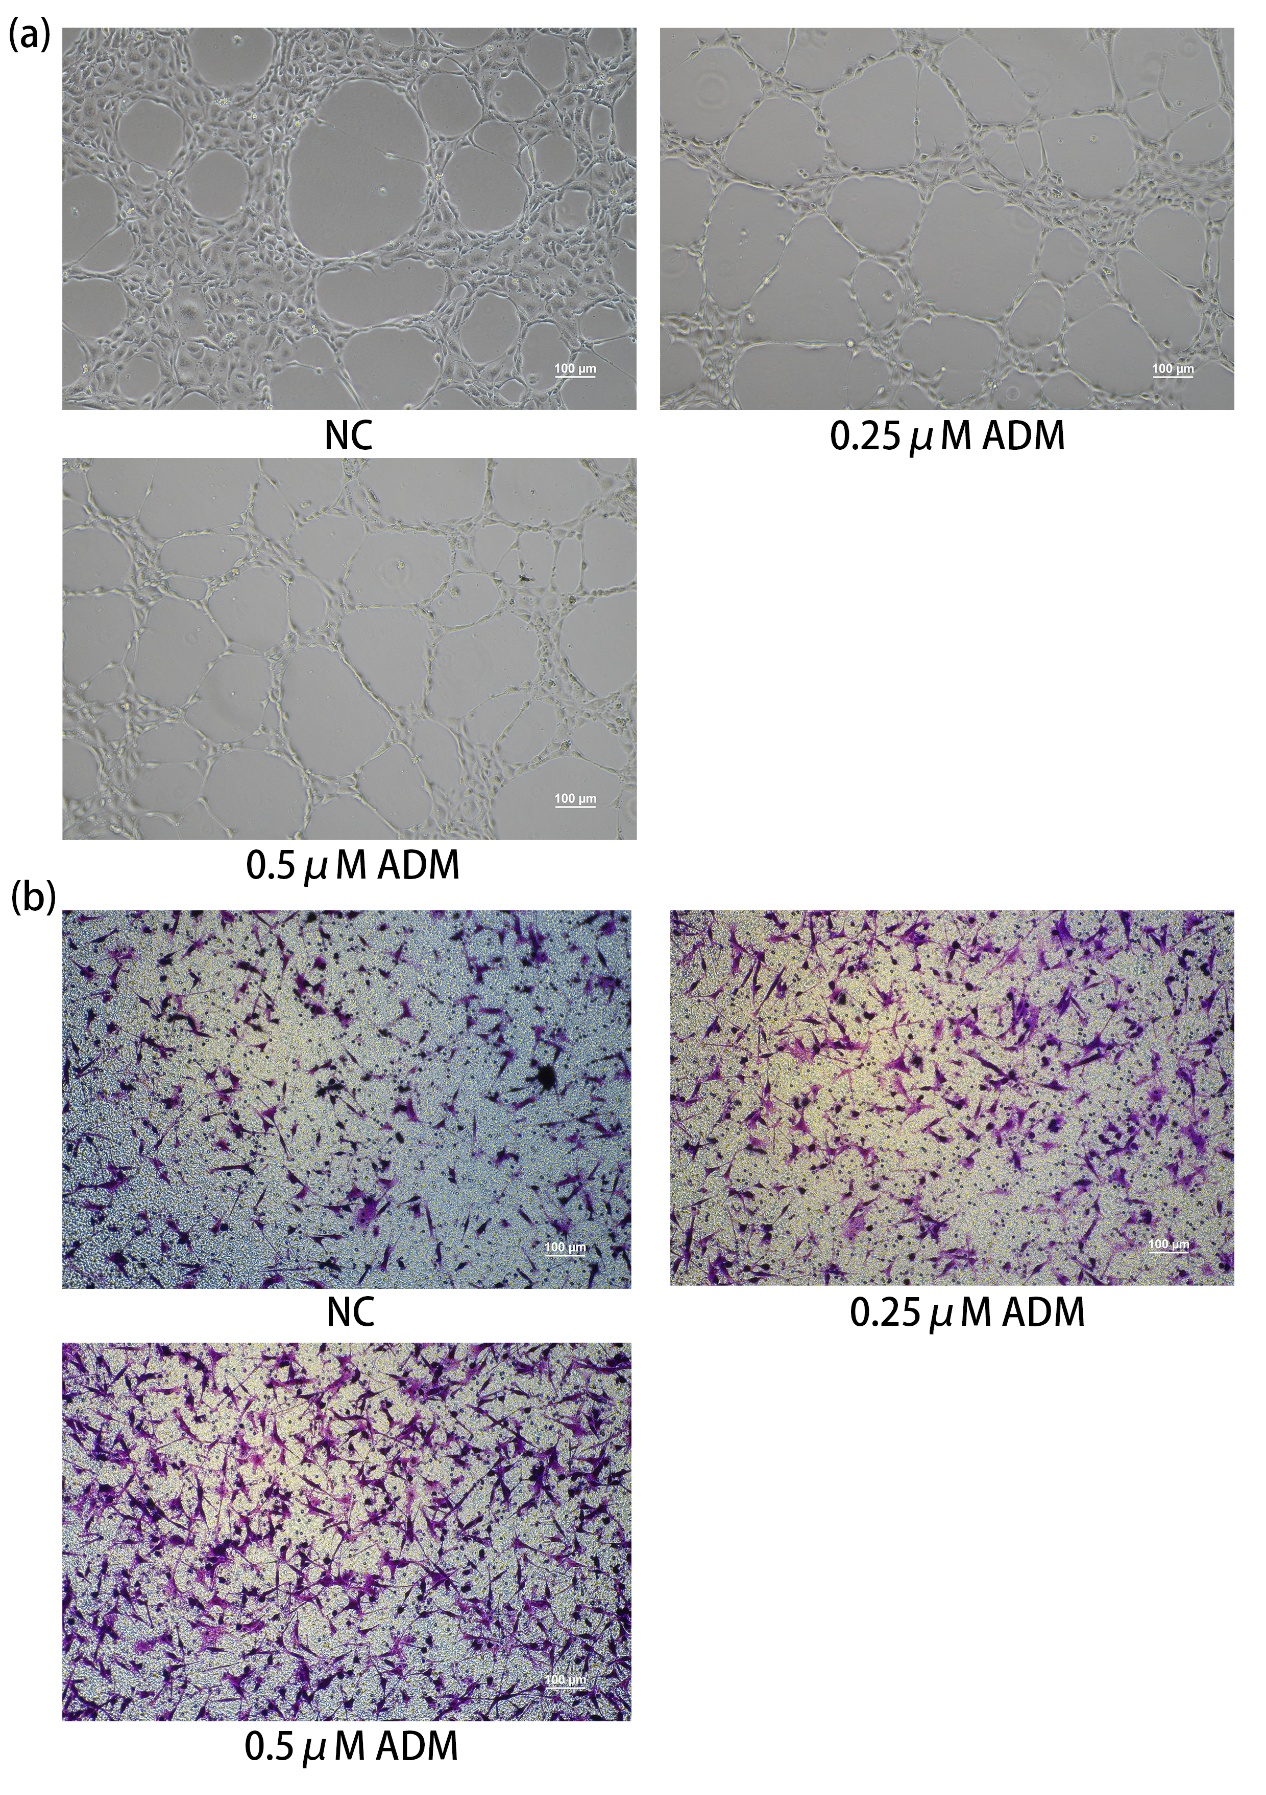


Supplementary Figure 13. Effects of ADM stimulation. (a) Angiogenesis assay of HUVECs cultured with ADM. (b) Transwell migration assay of U87 cells cultured with ADM.

| **siRNA sequences：** |  |
| --- | --- |
| ADM sense | GCCAGAGCAUGAACAACUUTT |
| ADM antisense | AAGUUGUUCAUGCUCUGGCGG |
| ICAM1 sense | CAACCAAUGUGCUAUUCAATT |
| ICAM1 antisense | UUGAAUAGCACAUUGGUUGGC |
| **Primer Sequences:** |  |
| ADM forward sequence | ATGAAGCTGGTTTCCGTCG |
| ADM reverse sequence | GACATCCGCAGTTCCCTCTT |
| ICAM1 forward sequence | ATGCCCAGACATCTGTGTCC |
| ICAM1 reverse sequence | GGGGTCTCTATGCCCAACAA |
| GAPDH forward sequence | GGAGCGAGATCCCTCCAAAAT |
| GAPDH reverse sequence | GGCTGTTGTCATACTTCTCATGG |
| CCL2 forward sequence | CAGCCAGATGCAATCAATGCC |
| CCL2 reverse sequence | TGGAATCCTGAACCCACTTCT |
| IL33 forward sequence | GTGACGGTGTTGATGGTAAGAT |
| IL33 reverse sequence | AGCTCCACAGAGTGTTCCTTG |
| IL15 forward sequence | TTGGGAACCATAGATTTGTGCAG |
| IL15 reverse sequence | GGGTGAACATCACTTTCCGTAT |
| IL1B forward sequence | ATGATGGCTTATTACAGTGGCAA |
| IL1B reverse sequence | GTCGGAGATTCGTAGCTGGA |
| CXCL16 forward sequence | CCCGCCATCGGTTCAGTTC |
| CXCL16 reverse sequence | CCCCGAGTAAGCATGTCCAC |
| CCL5 forward sequence | CCAGCAGTCGTCTTTGTCAC |
| CCL5 reverse sequence | CTCTGGGTTGGCACACACTT |
| VCAM1 forward sequence | GGGAAGATGGTCGTGATCCTT |
| VCAM1 reverse sequence | TCTGGGGTGGTCTCGATTTTA |
| SELP forward sequence | ACTGCCAGAATCGCTACACAG |
| SELP reverse sequence | CACCCATGTCCATGTCTTATTGT |
| SELE forward sequence | AGAGTGGAGCCTGGTCTTACA |
| SELE reverse sequence | CCTTTGCTGACAATAAGCACTGG |

Supplementary Table 1. SiRNA and primers sequences used in this study.

| ONTOLOGY | GO | EVIDENCE | SYMBOL |
| --- | --- | --- | --- |
| BP | GO:0045765 | NAS | KRIT1 |
| BP | GO:0045765 | TAS | CTNNB1 |
| BP | GO:0045765 | IEA | EFNA1 |
| BP | GO:0045765 | ISS | EPHA2 |
| BP | GO:0045765 | IDA | EMP2 |
| BP | GO:0045765 | IMP | EMP2 |
| BP | GO:0045765 | NAS | ERBB2 |
| BP | GO:0045765 | IMP | ETS1 |
| BP | GO:0045765 | TAS | FGF2 |
| BP | GO:0045765 | TAS | HMOX1 |
| BP | GO:0045765 | IC | IL6 |
| BP | GO:0045765 | NAS | KRT1 |
| BP | GO:0045765 | IDA | LEP |
| BP | GO:0045765 | IMP | NF1 |
| BP | GO:0045765 | IMP | PDE3B |
| BP | GO:0045765 | IMP | PIK3CG |
| BP | GO:0045765 | IEA | MAPK7 |
| BP | GO:0045765 | IBA | RNH1 |
| BP | GO:0045765 | IDA | RNH1 |
| BP | GO:0045765 | ISS | SFRP1 |
| BP | GO:0045765 | IMP | SP100 |
| BP | GO:0045765 | IDA | WARS1 |
| BP | GO:0045765 | IEA | RECK |
| BP | GO:0045765 | IMP | RAPGEF3 |
| BP | GO:0045765 | NAS | GPNMB |
| BP | GO:0045765 | IDA | HTATIP2 |
| BP | GO:0045765 | NAS | CXCL13 |
| BP | GO:0045765 | NAS | PDCD10 |
| BP | GO:0045765 | IBA | VASH1 |
| BP | GO:0045765 | ISS | PLXND1 |
| BP | GO:0045765 | ISS | TSPAN12 |
| BP | GO:0045765 | ISS | ADGRA2 |
| BP | GO:0045765 | ISS | EGLN1 |
| BP | GO:0045765 | IBA | VASH2 |
| BP | GO:0045765 | NAS | CCM2 |
| BP | GO:0045765 | IEA | PROK1 |
| BP | GO:0045765 | IMP | OR10J5 |
| BP | GO:0045765 | IBA | BMPER |

Supplementary Table 2. The gene set of Regulation of Angiogenesis (GO:0045765)

| Endo0 | Endo1 | BMDM0 | BMDM1 | BMDM2 |
| --- | --- | --- | --- | --- |
| ABCG2 | SELP | SLCO2B1 | VCAN | PCLAF |
| CCN2 | CPXM2 | GPR34 | C15orf48 | STMN1 |
| SEPTIN2 | SELE | SELENOP | FCN1 | CKS1B |
| SEPTIN7 | ACKR1 | A2M | SLC2A3 | TK1 |
| SLC38A5 | AQP1 | C3 | NDRG1 | MKI67 |
| CA2 | ZNF385D | C1QC | SMIM25 | TYMS |
| MFSD2A | LAMP3 | TREM2 | S100A12 | NUSAP1 |
| IGFBP3 | S100A9 | CPM | ADM | CENPF |
| EEF1G | FAM198B | C1QB | IL1R2 | TOP2A |
| HOPX | NNMT | C1QA | MCEMP1 | BIRC5 |
| PRXL2A | SEPT6 | IL18 | VEGFA | PTTG1 |
| CDH2 | CORO1A | PLTP | HK2 | RPA3 |
| MRTFB | CSF2RB | ADORA3 | AQP9 | CDK1 |
| PALM2-AKAP2 | COL15A1 | AKR1B1 | FLNA | SMC2 |
| SNHG29 | PTPRC | FUCA1 | UPP1 | DTYMK |
| SLC7A5 | C8orf59 | HLA-DQA1 | EREG | SMC4 |
| CCN1 | S100A4 | EPB41L2 | ANPEP | ZWINT |
| TLE5 | MTHFD2 | HLA-DMB | SLC25A37 | CENPM |
| SORT1 | PTAFR | TMEM176B | TREM1 | PCNA |
| SPINK8 | HCST | VSIG4 | FOSL2 | PRC1 |
| ITPRID2 | LYZ | MERTK | RGCC | MAD2L1 |
| DIPK2B | IL33 | DNASE2 |  | CENPK |
| ITIH5 | S100A8 | AXL |  | TMEM106C |
| COBLL1 | CYR61 | GAA |  | CEP55 |
| RBP1 | LITAF | SERPINF1 |  | LMNB1 |
| RO60 | TMEM273 | PDK4 |  | CLSPN |
| MAGI2-AS3 | HLA-DMA | MS4A6A |  | CDKN3 |
| MICOS10 | SEPT2 | CADM1 |  | DUT |
| BTNL9 | FAM129B | FRMD4A |  | CENPW |
| UBE2V1 | CD69 | CD302 |  | SKA2 |
| MT1E | CD74 | MS4A4A |  | SNRNP25 |
| TOMM6 | FAM167B | SLC1A3 |  | ASPM |
| SLC2A1 | LCP1 | FCHO2 |  | TPX2 |
| RNASEK | PLXDC2 | SLC40A1 |  | UBE2C |
| ATP6V0C | POLR2J3.1 | MS4A7 |  | GGH |
| CIAO2B | MMP1 |  |  | RAD51AP1 |
| SNHG5 | PABPC1 |  |  | RRM2 |
| SNHG6 | MLXIP |  |  | LSM5 |
| SNHG14 | SELL |  |  | CENPX |
| TRAPPC5 | DUSP2 |  |  | CENPU |
| MICOS13 | P2RY6 |  |  | DNMT1 |
| MMP28 | SLC6A6 |  |  | HMGB3 |
| SGPP2 | IL7R |  |  | TMPO |
| NIBAN2 | C19orf70 |  |  | DNAJC9 |
| TUG1 | PTP4A1 |  |  | PARP1 |
| SAMD12 | FRMD4A |  |  | HELLS |
| AL627171.2 | FBLN2 |  |  | GTSE1 |
| PLLP | SMIM37 |  |  | RANBP1 |
| LINC00472 | ABCC4 |  |  | ATAD2 |
| MYEF2 | MAN1A1 |  |  | KPNA2 |
| UNC5B | ALOX5AP |  |  | CKS2 |
| LRATD1 | MUC20-OT1 |  |  | CARHSP1 |
| DENND11 | CD44 |  |  | IDH2 |
| SELENOP | RAC2 |  |  | MCM7 |
| OIP5-AS1 | SLA |  |  | CBX5 |
| DANCR | PQLC1 |  |  | PHF19 |
| APCDD1 | ICAM1 |  |  | ITGB3BP |
| PLAAT3 | C15orf48 |  |  | SHCBP1 |
| NID2 | GYPC |  |  | ANP32E |
| RESF1 | CD53 |  |  | HMMR |
| KIF5C | SAMSN1 |  |  | GMNN |
| TPD52 | LGALS9 |  |  | DHFR |
| LINC01578 | SPI1 |  |  | NASP |
| SORBS1 | NR4A2 |  |  | RRM1 |
| GAS5 | TINAGL1 |  |  | LSM4 |
| TMEM35B | CXorf36 |  |  | HIST1H4C |
| RBIS | SEPT7 |  |  | NUDT1 |
| MATN3 | CMTM7 |  |  | CKAP2 |
| ELOVL7 | MINOS1 |  |  | UQCC2 |
| CGNL1 | IGHG1 |  |  | KIF11 |
|  | FYB1 |  |  | KIF20B |
|  | HLA-DRA |  |  | SMC1A |
|  | COTL1 |  |  | FAM111A |
|  | OLFM1 |  |  | RBBP7 |
|  | SLC11A1 |  |  | BRCA2 |
|  | AES |  |  | TACC3 |
|  | C19orf24 |  |  | MCM5 |
|  | POSTN |  |  | NUF2 |
|  | PRCP |  |  | CCNA2 |
|  | CD37 |  |  | H2AFX |
|  | C9orf3 |  |  | USP1 |
|  | MALL |  |  | MZT2A |
|  | HLA-DMB |  |  | PSIP1 |
|  | HLA-DPB1 |  |  | KNL1 |
|  | NEURL1B |  |  | LSM2 |
|  | PPIF |  |  | CCDC167 |
|  | ITGB2 |  |  | GGCT |
|  | C6orf48 |  |  | H2AFV |
|  | SSSCA1 |  |  | NME1 |
|  | NUAK1 |  |  | SNRPD1 |
|  | SEPT10 |  |  | MCM3 |
|  | ARL4C |  |  | ANLN |
|  | CLEC7A |  |  | MCM4 |
|  | PLEK |  |  | CCNB2 |
|  | FCER1G |  |  | UHRF1 |
|  | TYMP |  |  | FEN1 |
|  | ABCF2.1 |  |  | SGO2 |
|  | MKL2 |  |  | BRCA1 |
|  | ITGAX |  |  | BUB3 |
|  | FCGR1A |  |  | ATAD5 |
|  | CD52 |  |  | TUBA1C |
|  | DOC2B |  |  | CCDC34 |
|  | CD163 |  |  | SMC3 |
|  | IGLC2 |  |  | TUBB |
|  | CTGF |  |  | CENPE |
|  | NR2F2 |  |  | TOMM5 |
|  | LST1 |  |  | HNRNPAB |
|  | C3orf58 |  |  | TFDP1 |
|  | FPR1 |  |  | TMEM160 |
|  | SEPT11 |  |  | PSMC3 |
|  | LHX6 |  |  | KIF22 |
|  | SLC1A5 |  |  | HMGB2 |
|  | FKBP2 |  |  | H2AFZ |
|  | TNFRSF1A |  |  | DDX39A |
|  | EHBP1L1 |  |  | PSME2 |
|  | KIAA1551 |  |  | ZDHHC12 |
|  | CD84 |  |  | SIVA1 |
|  | LTC4S |  |  | BRI3BP |
|  | LYVE1 |  |  | BARD1 |
|  | B3GNT5 |  |  | HIST1H1D |
|  | CD14 |  |  | AURKB |
|  | ZFP36L2 |  |  | TUBB4B |
|  | MCUB |  |  | NCAPG |
|  | BCL3 |  |  | BOLA3 |
|  | BCL2A1 |  |  | ORC6 |
|  | DOK5 |  |  | FAM111B |
|  | TSPO |  |  | SNRPF |
|  | RGS10 |  |  | CDC20 |
|  | NCBP2-AS2 |  |  | MCM6 |
|  | SEPT9 |  |  | HIST1H1E |
|  | CNKSR3 |  |  | DLGAP5 |
|  | C1orf162 |  |  | ASF1B |
|  | LGI2 |  |  | TPRKB |
|  | RAMP3 |  |  | CENPN |
|  | SNHG15 |  |  | NUCKS1 |
|  | PVT1 |  |  | LDHB |
|  | FAM208A |  |  | ESCO2 |
|  | CCDC69 |  |  | MRPL51 |
|  | FOSB |  |  | PRIM1 |
|  | HLA-DQB1 |  |  | POLE3 |
|  | MAST3 |  |  | TCF19 |
|  | PARVG |  |  | FDPS |
|  | SBNO2 |  |  | CDKN2C |
|  | AIF1 |  |  | SGO1 |
|  | UCP2 |  |  | DCTPP1 |
|  | SERPINA1 |  |  | HSPB11 |
|  | FCGR2A |  |  | CCNB1 |
|  | PDLIM1 |  |  | SNRPB |
|  | ZDHHC13 |  |  | SSRP1 |
|  | PLEKHO1 |  |  | PA2G4 |
|  | MCTP1 |  |  | TMEM109 |
|  | HLA-DRB1 |  |  | UBE2T |
|  | CYBB |  |  | NSD2 |
|  | HCLS1 |  |  | NME4 |
|  | IER3 |  |  | CMSS1 |
|  | AREG |  |  | HAUS1 |
|  | GPR183 |  |  | COMMD4 |
|  | HLA-DPA1 |  |  | VDAC3 |
|  | HAVCR2 |  |  | NCAPD2 |
|  | PCDH17 |  |  | CDK4 |
|  | CXCR4 |  |  | PRKDC |
|  | PMP22 |  |  | SAE1 |
|  | G0S2 |  |  | EZH2 |
|  | CTSS |  |  | DIAPH3 |
|  | NCF1 |  |  | RAD21 |
|  | APBB1IP |  |  | C19orf48 |
|  | CD68 |  |  | PPM1G |
|  | EHD3 |  |  | MND1 |
|  | PCAT1 |  |  | GINS2 |
|  | BIRC3 |  |  | SNRPG |
|  | RPL22L1 |  |  | FANCI |
|  | CSF1R |  |  | CENPH |
|  | PTK2B |  |  | KIFC1 |
|  | CPVL |  |  | NUCB2 |
|  | STXBP2 |  |  | MRPL17 |
|  | PRR5 |  |  | HINT2 |
|  | CAPG |  |  | HIRIP3 |
|  | DUSP23 |  |  | ANAPC11 |
|  | MAP7D3 |  |  | NCAPG2 |
|  | PABPC4 |  |  | HACD3 |
|  | HSPA1B |  |  | MYBL2 |
|  | FAP |  |  | RFC3 |
|  | EVA1C |  |  | SPC25 |
|  | IL15 |  |  | HADH |
|  | CCL2 |  |  | RACGAP1 |
|  | CMIP |  |  | PAICS |
|  | SEMA4A |  |  | DCK |
|  | HIF1A |  |  | PPIH |
|  | ENO1 |  |  | HIST1H1B |
|  | MYC |  |  | CDT1 |
|  | LMNA |  |  | IMPDH2 |
|  | C19orf66 |  |  | CHEK1 |
|  | OLR1 |  |  | FOXM1 |
|  | C5AR1 |  |  | RAN |
|  | SLC38A2 |  |  | ARHGAP11A |
|  | FAM208B |  |  | NDC80 |
|  | FAM171A1 |  |  | EBP |
|  | SLC29A1 |  |  | MELK |
|  | FAM84B |  |  | RPL39L |
|  | TLL1 |  |  | ANP32B |
|  | TNFRSF10B |  |  | SUZ12 |
|  | KLHL6 |  |  | NCAPH |
|  | ADAMTS9 |  |  | HIST1H1C |
|  | COL6A2 |  |  | PRR11 |
|  | SLCO2A1 |  |  | UBE2S |
|  | ERAP2 |  |  | SLBP |
|  | TRABD |  |  | LIG1 |
|  | SEPT8 |  |  | HAT1 |
|  | LYAR |  |  | BUB1 |
|  | LIMD2 |  |  | MZT2B |
|  | SDF2L1 |  |  | EXOSC8 |
|  | BZW2 |  |  | AURKA |
|  | THBD |  |  | TOPBP1 |
|  | ASNA1 |  |  | NAP1L4 |
|  | BNC2 |  |  | GLRX5 |
|  | RASA4 |  |  | PGP |
|  | BAZ1A |  |  | CDCA5 |
|  | COL4A3BP |  |  | TPGS2 |
|  | RAB31 |  |  | SUPT16H |
|  | TKT |  |  | MAGOHB |
|  | NUPL2 |  |  | BUB1B |
|  | UPP1 |  |  | SAC3D1 |
|  | NFKB1 |  |  | NCAPD3 |
|  | APOPT1 |  |  | MZT1 |
|  | ZNF331 |  |  | DEK |
|  | EFHD2 |  |  | YEATS4 |
|  | ITGB4 |  |  | ACTL6A |
|  | RUNX1 |  |  | VRK1 |
|  | MS4A6A |  |  | CSE1L |
|  | ACTN1 |  |  | KIF4A |
|  | SH3TC1 |  |  | PAFAH1B3 |
|  | SLC39A14 |  |  | KIF14 |
|  | THBS1 |  |  | CKAP2L |
|  | MAFB |  |  | COQ2 |
|  | NOP16 |  |  | FADS1 |
|  | AAED1 |  |  | WDR76 |
|  | TRIM28 |  |  | RFC4 |
|  | NFKBIZ |  |  | CDCA8 |
|  | CTSL |  |  | DBF4 |
|  | C6orf106 |  |  | WDR34 |
|  | HLA-DQA1 |  |  | SNRPA1 |
|  | CD83 |  |  | DEPDC1 |
|  | GNB4 |  |  | CDCA3 |
|  | ACSL1 |  |  | TUBA1B |
|  | FAM173A |  |  | HPF1 |
|  | NPC2 |  |  | HMGN2 |
|  | CRELD2 |  |  | HIST2H2AC |
|  | ARRB2 |  |  | RPA1 |
|  | CCL4 |  |  | SPDL1 |
|  | MAT2A |  |  | POLD2 |
|  | ISOC2 |  |  | TUBG1 |
|  | NRGN |  |  | KIF23 |
|  | LRRC75A |  |  | CENPA |
|  | GPRIN3 |  |  | TROAP |
|  | MYO5A |  |  | RPA2 |
|  | ARHGAP23 |  |  | CCDC14 |
|  | RGS1 |  |  | SVIP |
|  | IMPDH2 |  |  | WEE1 |
|  | PIP4K2A |  |  | LMNB2 |
|  | FJX1 |  |  | MYCBP |
|  | CPLX1 |  |  | CIP2A |
|  | TYROBP |  |  | CKAP5 |
|  | CLUH |  |  | MCM2 |
|  | FKBP11 |  |  | PXMP2 |
|  | ATP11C |  |  | PARPBP |
|  | SORL1 |  |  | POLR3K |
|  | ADAM15 |  |  | SNRNP40 |
|  | TCOF1 |  |  | POP7 |
|  | RRP12 |  |  | RFC2 |
|  | BTN3A2 |  |  | CEP78 |
|  | FAM110D |  |  | NPM3 |
|  | STK17B |  |  | MAD2L2 |
|  | LPCAT2 |  |  | FBXO5 |
|  | FAM241A |  |  | TTF2 |
|  | PYCARD |  |  | BCL2L12 |
|  | NT5E |  |  | NUP210 |
|  | RCN1 |  |  | RANGAP1 |
|  | SLC25A37 |  |  | HERC5 |
|  | FBN1 |  |  | CHAF1A |
|  | DUSP4 |  |  | CCDC18 |
|  | C1orf21 |  |  | MRPL37 |
|  | ARID5B |  |  | EEF1E1 |
|  | IL1B |  |  | PLGRKT |
|  | DOCK8 |  |  | ECT2 |
|  | TGFBR3 |  |  | DSN1 |
|  | PLXNB2 |  |  | MPHOSPH9 |
|  | SFMBT2 |  |  | LRR1 |
|  | APLNR |  |  | POLD3 |
|  | CSK |  |  | EMC9 |
|  | MANF |  |  | ACAT2 |
|  | POLD2 |  |  | ALYREF |
|  | RELB |  |  | ZWILCH |
|  | EPHB4 |  |  | RBBP8 |
|  | ANXA6 |  |  | ICMT |
|  | PUS1 |  |  | PRADC1 |
|  | KDM6B |  |  | NETO2 |
|  | TRAF3 |  |  | MTHFD1 |
|  | CELF2 |  |  | EXOSC9 |
|  | JAK3 |  |  | CDKN2A |
|  | CITED2 |  |  | POLD1 |
|  | IGFBP4 |  |  | MIS18A |
|  | TSPAN18 |  |  | RAD51C |
|  | BOP1 |  |  | CDCA7L |
|  | NDRG1 |  |  | PRPS2 |
|  | TNFAIP3 |  |  | RBL1 |
|  | FAM45A |  |  | GMPS |
|  | GLIPR1 |  |  | ALDH7A1 |
|  | IQCA1 |  |  | RUVBL2 |
|  | METRNL |  |  | CDC25B |
|  | METTL1 |  |  | CASP8AP2 |
|  | CASP1 |  |  | CDK5RAP2 |
|  | VARS |  |  | CRIP1 |
|  | SPNS2 |  |  |  |
|  | PAICS |  |  |  |
|  | MS4A7 |  |  |  |
|  | SLC16A3 |  |  |  |
|  | DNAAF5 |  |  |  |
|  | GPATCH4 |  |  |  |
|  | CXCL16 |  |  |  |
|  | FNDC4 |  |  |  |
|  | RIOX2 |  |  |  |
|  | SEMA6B |  |  |  |
|  | NFATC1 |  |  |  |
|  | EXOSC5 |  |  |  |
|  | SERPINE2 |  |  |  |
|  | ABI3 |  |  |  |
|  | ATP2B1-AS1 |  |  |  |
|  | CHTF8 |  |  |  |
|  | NPM3 |  |  |  |
|  | KAZN |  |  |  |
|  | BCAR1 |  |  |  |
|  | RRS1 |  |  |  |
|  | MYBBP1A |  |  |  |
|  | REL |  |  |  |
|  | TNFAIP2 |  |  |  |
|  | GPSM3 |  |  |  |
|  | ADAMTS4 |  |  |  |
|  | NFKB2 |  |  |  |
|  | PRKAR1B |  |  |  |
|  | KIAA1211L |  |  |  |
|  | RASAL3 |  |  |  |
|  | CKS2 |  |  |  |
|  | EHD1 |  |  |  |
|  | NINJ1 |  |  |  |
|  | NLN |  |  |  |
|  | NT5C |  |  |  |
|  | SF3B4 |  |  |  |
|  | PHLDA3 |  |  |  |
|  | LCP2 |  |  |  |
|  | AEN |  |  |  |
|  | NIP7 |  |  |  |
|  | ENTR1 |  |  |  |
|  | MTHFD1L |  |  |  |
|  | RCAN1 |  |  |  |
|  | SNHG12 |  |  |  |
|  | TRIB1 |  |  |  |
|  | SHKBP1 |  |  |  |
|  | ZNF267 |  |  |  |
|  | TUBB6 |  |  |  |
|  | TOP1MT |  |  |  |
|  | FAM96A |  |  |  |
|  | OTUD1 |  |  |  |
|  | MNT |  |  |  |
|  | EMP3 |  |  |  |
|  | DPAGT1 |  |  |  |
|  | EGR3 |  |  |  |
|  | MRC1 |  |  |  |
|  | CEBPB |  |  |  |
|  | SRGAP1 |  |  |  |
|  | RNASET2 |  |  |  |
|  | STAT5A |  |  |  |
|  | ZMAT3 |  |  |  |
|  | MLST8 |  |  |  |
|  | WDR12 |  |  |  |
|  | PRKCE |  |  |  |
|  | RPP40 |  |  |  |
|  | ALDH16A1 |  |  |  |
|  | RIN3 |  |  |  |
|  | RBM14 |  |  |  |
|  | UBE2E2 |  |  |  |
|  | PPRC1 |  |  |  |
|  | FARSA |  |  |  |
|  | TMEM250 |  |  |  |
|  | MYD88 |  |  |  |
|  | CCL5 |  |  |  |
|  | DNPH1 |  |  |  |
|  | ATP6V1B2 |  |  |  |
|  | CLSTN3 |  |  |  |
|  | SAMD4A |  |  |  |
|  | EFEMP1 |  |  |  |
|  | PFKFB3 |  |  |  |
|  | MED16 |  |  |  |
|  | MICAL2 |  |  |  |
|  | CDC25B |  |  |  |
|  | CCNG2 |  |  |  |
|  | APOC1 |  |  |  |
|  | ATF3 |  |  |  |
|  | PLEKHO2 |  |  |  |
|  | CCL3 |  |  |  |
|  | LAPTM5 |  |  |  |

Supplementary Table 3. The signature genes of the subclusters

| MG_Markers | BMDM_Markers |
| --- | --- |
| CCL4 | HLA-DQA1 |
| ADRB2 | MS4A6A |
| NAV3 | TGFBI |
| ADORA3 | HLA-DRB5 |
| SIGLEC8 | CD74 |
| SPRY1 | DSE |
| TAL1 | CD93 |
| RHOB | FOSL2 |
| BIN1 | PLTP |
| SALL1 | THBD |
| KLF2 | IFITM2 |
| BHLHE41 | METRNL |
| SLC1A3 | IQGAP1 |
| P2RY12 | PDE4B |
|  | FPR3 |
|  | BHLHE40 |
|  | TNFSF13 |
|  | HLA-DMB |
|  | KYNU |
|  | ITGA4 |
|  | CREM |
|  | GPR65 |
|  | FGR |
|  | MXD1 |
|  | IL1RN |
|  | FAM49A |
|  | SH3BGRL |
|  | EMB |
|  | S100A11 |
|  | LYZ |
|  | PTPN7 |
|  | SAMHD1 |
|  | SPINT2 |
|  | NFIL3 |
|  | TMEM123 |
|  | CIB1 |
|  | CIITA |
|  | TREM1 |
|  | VOPP1 |
|  | IL10 |
|  | PLAC8 |
|  | DOK3 |
|  | CYBB |
|  | CYTH1 |
|  | GPR132 |
|  | SYNGR2 |
|  | PLBD1 |
|  | PIM1 |
|  | FXYD5 |
|  | ARG2 |
|  | PQLC3 |
|  | MS4A7 |

Supplementary Table 4. The gene set used to identify BMDM and microglia
